# Supplementary material for: Managing Soil Nitrogen Surplus: The Role of Winter Cover Crops in N 2 O Emissions and Carbon Sequestration
Source: Copernicus journal article supplement (doi:10.5194/egusphere-2024-2849), 2024-10-17
Supplement: Supplementary file 1 [file egusphere-2024-2849-supplement.pdf]

# Managing Soil Nitrogen Surplus: The Role of Winter Cover Crops in N<sub>2</sub>O Emissions and Carbon Sequestration

Victoria Nasser<sup>1</sup>, René Dechow<sup>2</sup>, Mirjam Helfrich<sup>2</sup>, Ana Mejjide<sup>3</sup>, Pauline Sophie Rummel<sup>1,4</sup>, Heinz-Josef Koch<sup>5</sup>, Reiner Ruser<sup>6</sup>, Lisa Essich<sup>6</sup>, Klaus Dittert<sup>1</sup>

5 <sup>1</sup>Department of Crop Sciences, Georg August University of Göttingen, Göttingen, 37075, Germany

<sup>2</sup>Thünen Institute of Climate-Smart Agriculture, Braunschweig, 38116, Germany

<sup>3</sup>Environment Modeling, Institute of Crop Science and Resource Conservation (INRES), University of Bonn, Bonn, 53113, Germany

<sup>4</sup>Department of Biology, Microbiology, Aarhus University, Aarhus, 8000, Denmark

10 <sup>5</sup>Department of Agronomy, Institute of Sugar Beet Research, Göttingen, 37079, Germany

<sup>6</sup>Department of Fertilization and Soil Matter Dynamics (340i), Institute of Crop Science, University of Hohenheim, Stuttgart, Germany

*Correspondence to:* Victoria Nasser (victoria.nasser@uni-goettingen.de)

## Supplementary material

15 **Table S1.** Mean water-filled pore space (WFPS %) values across different cropping phases. Means (n=4) ± (SD).

|    |     | Cover crop phase | Sugar beet phase | Winter wheat phase |             |
|----|-----|------------------|------------------|--------------------|-------------|
| 20 | G18 | Fallow           | 60.1 (23.9)      | 53.2 (20.1)        | 80.4 (17.1) |
|    |     | Winter rye       | 55.2 (24.1)      | 54.3 (21.8)        | 79.1 (15)   |
|    |     | Saia oat         | 54.4 (24.2)      | 53.5 (20.5)        | 78.9 (15.2) |
|    |     | Spring vetch     | 56.8 (23.1)      | 53.2 (20)          | 78.9 (15.6) |
| 25 | H18 | Fallow           | 66.4 (21)        | 48.1 (12.3)        | 69.5 (9.8)  |
|    |     | Winter rye       | 65.3 (24.5)      | 47.6 (14.6)        | 72.2 (8.3)  |
|    |     | Saia oat         | 64.1 (24.5)      | 45.9 (13.9)        | 71.7 (9.1)  |
|    |     | Spring vetch     | 68.2 (23.4)      | 48 (13.6)          | 72.5 (8.3)  |
| 25 | G19 | Fallow           | 68.6 (27)        | 47.1 (13.9)        | 69.8 (9.8)  |
|    |     | Winter rye       | 65.6 (17.9)      | 46.9 (15.2)        | 70.1 (11)   |
|    |     | Saia oat         | 63.2 (18)        | 46.9 (14.6)        | 70.7 (10.7) |
|    |     | Spring vetch     | 63.4 (15.9)      | 45.9 (14.4)        | 70 (12.6)   |
| 25 | H19 | Fallow           | 73.1 (10.5)      | 53.8 (11.3)        | 69.1 (11.7) |
|    |     | Winter rye       | 75.3 (12.5)      | 54.2 (13.6)        | 70.2 (11.3) |
|    |     | Saia oat         | 74.1 (13.5)      | 53.4 (14.7)        | 67.4 (10.8) |
|    |     | Spring vetch     | 76 (11.1)        | 52.8 (14.1)        | 68.7 (12.7) |

**Table S2.** Topsoil mineral nitrogen (SMN) levels [kg N ha<sup>-1</sup>] at key stages within the crop rotation. Means (n=4 for individual trials, n=16 for averages across all site-years; except for rye in the sugar beet and winter wheat phases n=12) ± (SD). Significant differences among treatments within each phase are indicated by lowercase letters (p<0.05).

| Trial | Treatment    | SMN [kg N ha <sup>-1</sup> ] |           |            |          |            |            |                  |         |                    |         |
|-------|--------------|------------------------------|-----------|------------|----------|------------|------------|------------------|---------|--------------------|---------|
|       |              | Cover crop phase             |           |            |          |            |            | Sugar beet phase |         | Winter wheat phase |         |
|       |              | Sep                          | Oct       | Nov        | Jan      | Feb        | Apr        | May              | Sep     | Nov                | Mar     |
| G18   | Fallow       | 80 (8)                       | 130 (16)  | 141 (51) a | 17 (4)   | 33 (5) a   | 29 (2) a   | 178 (47)         | 26 (23) | 66 (8)             | 13 (2)  |
|       | Winter rye   | 81 (30)                      | 121 (7)   | 14 (3) b   | 16 (3)   | 35 (12) ac | 30 (8) a   | 156 (11)         | 14 (7)  | 60 (11)            | 12 (2)  |
|       | Saia oat     | 94 (6)                       | 139 (46)  | 31 (2) b   | 34 (11)  | 95 (16) b  | 57 (14) b  | 159 (10)         | 13 (4)  | 72 (18)            | 13 (2)  |
|       | Spring vetch | 85 (5)                       | 130 (29)  | 66 (10) b  | 28 (5)   | 55 (3) c   | 48 (10) ab | 247 (74)         | 15 (3)  | 69 (15)            | 12 (2)  |
| H18   | Fallow       | 27 (8)                       | 50 (7)    | 54 (7) a   | 5 (1) ab | 8 (2) a    | 13 (4) a   | 155 (167)        | 5 (2)   | 37 (29)            | 7 (1)   |
|       | Winter rye   | 27 (7)                       | 67 (26)   | 5 (0.4) b  | 2 (1) a  | 7 (1) a    | 4 (2) b    | 176 (58)         | 3 (0)   | 20 (4)             | 5 (1)   |
|       | Saia oat     | 33 (7)                       | 57 (6)    | 5 (1) b    | 4 (2) ab | 15 (1) b   | 13 (4) a   | 144 (60)         | 4 (1)   | 23 (12)            | 7 (2)   |
|       | Spring vetch | 29 (1)                       | 62 (17)   | 25 (14) c  | 6 (2) b  | 15 (4) b   | 19 (2) a   | 188 (75)         | 9 (7)   | 16 (7)             | 4 (1)   |
| G19   | Fallow       | 58 (14)                      | 98 (10)   | 107 (38) a | 38 (22)  | 39 (25)    | 20 (2)     | 120 (84)         | 20 (4)  | 42 (10)            | 29 (8)  |
|       | Winter rye   | 52 (20)                      | 40 (13)   | 31 (16) b  | 19 (4)   | 24 (2)     | 18 (5)     | 168 (72)         | 28 (4)  | 59 (9)             | 30 (4)  |
|       | Saia oat     | 42 (10)                      | 129 (119) | 38 (11) b  | 34 (14)  | 49 (14)    | 20 (2)     | 119 (80)         | 27 (13) | 51 (11)            | 32 (7)  |
|       | Spring vetch | 49 (15)                      | 78 (16)   | 45 (13) b  | 29 (9)   | 33 (10)    | 26 (5)     | 100 (33)         | 24 (4)  | 62 (10)            | 27 (4)  |
| H19   | Fallow       | 33 (3)                       | 59 (9)    | 32 (4) a   | 8 (3)    | 9 (4) a    | 14 (1) ab  | 159 (57)         | 10 (7)  | 38 (19)            | 8 (2)   |
|       | Winter rye   | 26 (8)                       | 39 (6)    | 5 (1) b    | 6 (2)    | 6 (2) a    | 4 (1) a    | 198 (115)        | 11 (9)  | 52 (32)            | 7 (2)   |
|       | Saia oat     | 37 (12)                      | 45 (7)    | 7 (1) bc   | 12 (8)   | 20 (7) b   | 14 (6) ab  | 220 (76)         | 7 (3)   | 48 (53)            | 5 (1)   |
|       | Spring vetch | 40 (5)                       | 51 (14)   | 10 (4) c   | 8 (6)    | 11 (3) a   | 16 (10) b  | 156 (40)         | 7 (2)   | 44 (34)            | 7 (6)   |
| Mean  | Fallow       | 49 (23)                      | 84 (35)   | 83 (53) a  | 18 (17)  | 23 (19) ab | 19 (7)     | 153 (92)         | 15 (14) | 46 (21)            | 14 (10) |
|       | Winter rye   | 46 (29)                      | 67 (37)   | 14 (13) b  | 11 (9)   | 18 (14) a  | 14 (12)    | 177 (70)         | 10 (8)  | 44 (25)            | 8 (4)   |
|       | Saia oat     | 52 (27)                      | 92 (72)   | 20 (16) b  | 20 (16)  | 45 (34) b  | 26 (20)    | 160 (68)         | 13 (11) | 48 (32)            | 14 (11) |
|       | Spring vetch | 51 (23)                      | 80 (36)   | 37 (24) b  | 19 (13)  | 29 (19) ab | 27 (15)    | 173 (76)         | 14 (8)  | 48 (27)            | 13 (10) |

35 **Table S3.** Mean topsoil mineral nitrogen (SMN) values across different cropping phases for the different treatments. Means (n=4 for individual trials, n=16 for averages across all site-years; except for rye in the sugar beet and winter wheat phases n=12)  $\pm$  (SD). Significant differences among treatments within each phase are indicated by lowercase letters (p<0.05).

|    |      | SMN [kg N ha <sup>-1</sup> ] |                  |                    |              |                |
|----|------|------------------------------|------------------|--------------------|--------------|----------------|
|    |      | Cover crop phase             | Sugar beet phase | Winter wheat phase | Entire trial |                |
| 40 | G18  | Fallow                       | 80.5 (56.5) a    | 96 (72.5)          | 39.7 (22.5)  | 73.1 (58.1) a  |
|    |      | Winter rye                   | 41.1 (33.2) b    | 89.3 (62.4)        | 35.9 (20.1)  | 51.4 (45) b    |
|    |      | Saia oat                     | 64.9 (39.3) c    | 95.3 (61.5)        | 38.9 (23.9)  | 65.2 (46.9) a  |
|    |      | Spring vetch                 | 74 (43.3) ac     | 106.5 (82.5)       | 41.5 (25.8)  | 73 (56.9) a    |
| 45 | H18  | Fallow                       | 32.1 (21.8) a    | 41.9 (64.3)        | 14.3 (12)    | 31 (39.2)      |
|    |      | Winter rye                   | 13.5 (18.5) b    | 55.3 (80.7)        | 13.5 (5.7)   | 25.6 (48.9)    |
|    |      | Saia oat                     | 18.4 (15.3) b    | 47 (62)            | 13.5 (7.1)   | 25.6 (37.6)    |
|    |      | Spring vetch                 | 27.2 (17.4) a    | 52.8 (67.6)        | 13 (7.5)     | 31.4 (41)      |
| 50 | G19  | Fallow                       | 61.3 (36.3) a    | 56.5 (60.6)        | 39.7 (14)    | 54.1 (42.7)    |
|    |      | Winter rye                   | 31.2 (14.8) b    | 89.4 (77.4)        | 55.1 (22.1)  | 55.9 (51.9)    |
|    |      | Saia oat                     | 50.2 (45.8) a    | 61.9 (60.5)        | 45.9 (19.8)  | 52.8 (46.4)    |
|    |      | Spring vetch                 | 44 (17.8) ab     | 59.8 (43.9)        | 50.9 (29.3)  | 50.8 (31.6)    |
| 55 | H19  | Fallow                       | 26.9 (19) a      | 68.2 (94.4)        | 21.3 (14.2)  | 38.1 (57.6)    |
|    |      | Winter rye                   | 14.3 (15.6) b    | 66.6 (66.9)        | 21.7 (17.1)  | 32.3 (45.5)    |
|    |      | Saia oat                     | 19.8 (17.5) ab   | 68.3 (91.8)        | 19.7 (20.8)  | 34.7 (57.5)    |
|    |      | Spring vetch                 | 22.5 (16.9) a    | 62.4 (58.3)        | 23.1 (19)    | 34.9 (39.8)    |
| 50 | Mean | Fallow                       | 48.3 (41.2) a    | 62.4 (75.8)        | 28.4 (19.4)  | 47.4 (51.8) a  |
|    |      | Winter rye                   | 23.9 (24.3) b    | 67.7 (72.4)        | 23.3 (17.8)  | 34.6 (45.1) b  |
|    |      | Saia oat                     | 36.4 (36.7) c    | 65.2 (72)          | 29.3 (23)    | 43 (49.6) c    |
|    |      | Spring vetch                 | 40.4 (32.2) a    | 66.8 (65.1)        | 31.9 (26.4)  | 45.9 (45.4) ac |

**Table S4.** Cumulative N<sub>2</sub>O emissions across different cropping phases and entire trial (~18 months). Means (n=4 for individual trials, n=16 for averages across all site-years; except for rye in the sugar beet and winter wheat phases n=12) ± (SD). Significant differences among treatments within each phase are indicated by lowercase letters (p<0.05).

|      |              | N <sub>2</sub> O-N [kg ha <sup>-1</sup> ] |                  |                    |               |    |
|------|--------------|-------------------------------------------|------------------|--------------------|---------------|----|
|      |              | Cover crop phase                          | Sugar beet phase | Winter wheat phase | Entire trial  |    |
| G18  | Fallow       | 0.41 (0.12) a                             | 0.38 (0.14) ab   | 0.5 (0.13) ab      | 1.3 (0.32)    |    |
|      | Winter rye   | 0.46 (0.32) a                             | 1.47 (1) b       | 0.25 (0.05) a      | 2.18 (1.34)   |    |
|      | Saia oat     | 1.5 (0.47) b                              | 0.3 (0.21) a     | 0.76 (0.22) ab     | 2.56 (0.3)    |    |
|      | Spring vetch | 0.58 (0.33) a                             | 0.4 (0.11) ab    | 0.77 (0.41) b      | 1.76 (0.25)   |    |
| H18  | Fallow       | 0.11 (0.04) a                             | 0.3 (0.22) a     | 1.43 (0.34)        | 1.85 (0.4) a  |    |
|      | Winter rye   | 0.22 (0.12) a                             | 4.25 (3.12) b    | 0.78 (0.58)        | 5.24 (2.65) a |    |
|      | Saia oat     | 0.67 (0.32) b                             | 0.78 (0.25) a    | 1.6 (1.74)         | 3.05 (1.83) a | 65 |
|      | Spring vetch | 0.22 (0.16) a                             | 0.49 (0.06) a    | 0.99 (0.55)        | 1.7 (0.6) b   |    |
| G19  | Fallow       | 0.44 (0.33) ab                            | 0.76 (0.46)      | 1.85 (1.01)        | 3.06 (1.55)   |    |
|      | Winter rye   | 0.32 (0.04) a                             | 2.94 (2.2)       | 1.95 (1.44)        | 5.21 (2.53)   |    |
|      | Saia oat     | 0.46 (0.18) ab                            | 0.79 (0.18)      | 0.99 (0.38)        | 2.24 (0.33)   |    |
|      | Spring vetch | 0.91 (0.34) b                             | 1.01 (0.24)      | 0.73 (0.17)        | 2.65 (0.17)   |    |
| H19  | Fallow       | 0.18 (0.09)                               | 0.55 (0.21) a    | 3.45 (2.3)         | 4.92 (2.16)   |    |
|      | Winter rye   | 0.19 (0.07)                               | 4.59 (3.23) b    | 1.19 (0.98)        | 6.58 (4.92)   | 70 |
|      | Saia oat     | 0.46 (0.48)                               | 0.37 (0.18) a    | 2.08 (1.99)        | 4.25 (4.63)   |    |
|      | Spring vetch | 0.22 (0.12)                               | 0.74 (0.46) a    | 5.18 (6.86)        | 6.59 (7.08)   |    |
| Mean | Fallow       | 0.29 (0.22) a                             | 0.5 (0.31) a     | 1.81 (1.58) a      | 2.6 (1.71)    |    |
|      | Winter rye   | 0.3 (0.19) ab                             | 3.44 (2.81) b    | 0.74 (0.72) b      | 4.46 (2.98)   |    |
|      | Saia oat     | 0.78 (0.56) b                             | 0.56 (0.3) a     | 1.36 (1.32) ab     | 2.69 (1.36)   |    |
|      | Spring vetch | 0.49 (0.38) ab                            | 0.66 (0.34) a    | 1.92 (3.65) a      | 3.07 (3.8)    |    |

75

**Table S5.** Fitted crop specific parameter to describe depth distribution of root carbon (C<sub>w</sub>) for cover crops (equation 3, Gale und Grigal), derived total root carbon and share of root carbon in top soil on total root carbon

| Cover crop   | β    | C <sub>w</sub> 2018 | C <sub>w</sub> 2019 | share of C <sub>w</sub> in 0–20 cm [%] | share of C <sub>w</sub> in 0–30 cm [%] |
|--------------|------|---------------------|---------------------|----------------------------------------|----------------------------------------|
| Saia oat     | 0.95 | 0.34                | 0.23                | 64                                     | 79                                     |
| Spring vetch | 0.95 | 0.16                | 0.14                | 64                                     | 79                                     |
| Winter rye   | 0.93 | 0.51                | 0.35                | 77                                     | 89                                     |

85 **Table S6.** Averaged carbon input ( $t\ C\ ha^{-1}\ a^{-1}$ ) of the control scenario (no cover crops) for crop rotations CR1 and CR2

| Crop rotation | Site      | Cin <sub>shoot</sub> | Cin <sub>root</sub> | Cin <sub>fert</sub> | Cin <sub>total</sub> |
|---------------|-----------|----------------------|---------------------|---------------------|----------------------|
| CR1           | Göttingen | 2.57                 | 1.42                | 0.16                | 4.15                 |
| CR2           | Göttingen | 3.08                 | 1.44                | 0                   | 4.51                 |
| CR1           | Hohenheim | 2.32                 | 1.29                | 0.16                | 3.76                 |
| CR2           | Hohenheim | 2.83                 | 1.32                | 0                   | 4.15                 |

90 **Table S7.** Averaged carbon input from cover crop residues in ( $t\ C\ ha^{-1}$ ) for a profile depth of 0-30 cm.

| Cin Variable         | Cover crop   | Göttingen | Hohenheim |
|----------------------|--------------|-----------|-----------|
| Cin <sub>shoot</sub> | Saia oat     | 0.94      | 0.96      |
| Cin <sub>shoot</sub> | Spring vetch | 0.82      | 0.7       |
| Cin <sub>shoot</sub> | Winter rye   | 1.16      | 1.28      |
| Cin <sub>root</sub>  | Saia oat     | 0.3       | 0.3       |
| Cin <sub>root</sub>  | Spring vetch | 0.14      | 0.12      |
| Cin <sub>root</sub>  | Winter rye   | 0.5       | 0.54      |
| Cin <sub>total</sub> | Saia oat     | 1.24      | 1.26      |
| Cin <sub>total</sub> | Spring vetch | 0.96      | 0.82      |
| Cin <sub>total</sub> | Winter rye   | 1.66      | 1.82      |

Cin<sub>shoot</sub> Carbon input from above ground biomass, averaged measurements per site  
 Cin<sub>root</sub> Carbon input of below ground biomass, based on root:shoot ratios  
 Cin<sub>total</sub> Total carbon input

95

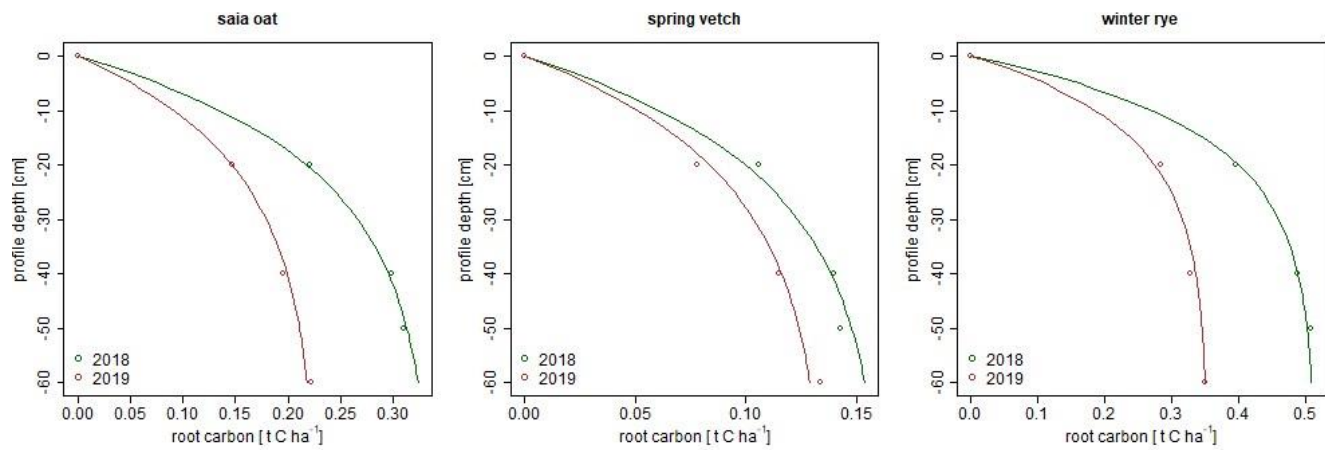

**Figure S1.** Accumulative depth distribution of root carbon for the Göttingen site. Fitted functions (equation 3, continuous lines) to describe the accumulative distribution of carbon in root biomass with depth using observed root carbon (points)
