# Supplementary material for: Managing Soil Nitrogen Surplus: The Role of Winter Cover Crops in N 2 O Emissions and Carbon Sequestration
Source: Copernicus journal article supplement (doi:10.5194/egusphere-2024-2849), 2024-10-17
Supplement: Supplementary file [file egusphere-2024-2849-RC1-supplement.pdf]

With pleasure I read the manuscript entitled 'Managing Soil Nitrogen Surplus: The Role of Winter Cover Crops in N<sub>2</sub>O Emissions and Carbon Sequestration'. There are still quite some knowledge gaps to fill regarding this topic and the authors contributed to bridging some of these gaps. In general, I think the manuscript is publishable after some minor revisions. Especially the carbon modelling needs more explanation. More specific comments are listed below.

L26-30: the field trial was only 16 months, but you estimated carbon sequestration over a 50 year time period. I guess the authors used simulation models to assess the potential long-term sequestration. But this should be added to the abstract.

L31-33: the authors recommend "optimized cover crop selection", but according to the results, not much difference in N<sub>2</sub>O emission and C sequestration is noticed between the different cover crop varieties.

L75-77: this is a stand-alone statement which comes out of the blue. Elaborate on it (because the authors also focused on the short-term N<sub>2</sub>O emissions), or delete the sentence (or move it to the discussion).

L81: "soil organic models", I think the word 'carbon turnover' or 'matter turnover' is missing here.

L109: I'd recommend to describe the soil characteristics for each Luvisol separately, so a reader knows which soil has a soil organic matter content of 20 g/kg and 30g/kg.

L115-135: it would help if the experimental design is accompanied with a table.

L154: please add a reference to your assumption of 2.65 g/cm<sup>3</sup>.

L156: please explain why you used two types of chambers. Can the results still be compared, because the volume of the two chambers differs?

L159: add 'N<sub>2</sub>O fluxes' between 'measured and 'using dark'. Again, how can you compare these results with the results from the other chambers used in Gottingen?

L172: replace (IPCC, 2019) for IPCC (2019)

L201: How do you know the effect in C stock change is caused by the addition of cover crops when you also apply other organic inputs (30m<sup>3</sup> digestate) at maize?

L206: I miss some information on the modelling using RothC and C-Tool. At the moment I'm not able to reproduce your modelling exercise. How did you use both tools (e.g., in an ensemble run or did one model complement the other)? How did you initialize the SOC stock? What historical management took place on the fields? Which site-specific input data did you require/use and which input data did you assume (e.g., soil depth, climate data, cover factor (what assumption did you make)? Is there any irrigation in the fields, or ploughing? What are the soil properties? Why did you choose for this model and not for a model that assesses C and N fluxes?

L217: the source you refer to studied tree species. How applicable is this approach for green manure and more specifically to the green manure types that were included in this study?

L219: replace 'a parameter' for 'a plant-specific parameter'

L226: why did you decide to copy the weather data 2018-2021. These were extremely dry years and might not be representative on the long term (as also mentioned in L230). Consider climate scenario's or a longer time range.

L250: it is not clear to me how the site-specific weather data differ from the DWD weather data. Also explain in Chapter 2.5 why you used DWD instead of site-specific weather data. I agree with your decision, but it might cause some confusion.

L285: the author did not mention the N fertilization of sugar beets before. This should be added to the methodology.

L321: why did vetch show N<sub>2</sub>O peaks, and why did only G18 show peaks and G19 not?

L415: the text below and the figures do not match. I'd expect two scenario's, one for CR1 and one for CR2, and the baselines (controls). Please, clarify the modelling approach.

L430: linking the results to research done in a completely different climatic zone requires more explanation or needs to be removed.

L445: in Chapter 4.2 some results are mentioned. Consider combining the Results and Discussion section or move the results to Chapter 3.

L622-624: do not repeat the results

L635 – 644: do not repeat the results. Re-write this section and try to be more concise.

Due to the high number of hypotheses, the Discussion is exhaustive and good, but extremely long. Perhaps consider a restructuring and start with an overview of the hypotheses (rejected or accepted) followed by a discussion and underpinning of the results for each hypothesis.
